# Supplementary material for: Synergistic cross‐talk of hedgehog and interleukin‐6 signaling drives growth of basal cell carcinoma
Source: PubMed Central journal article supplement (PMC6282712; doi:10.1002/ijc.31724), 2018-10-01
Supplement: IJC-143-2943-s002.pdf [file IJC-143-2943-s002.pdf]

**Supplementary tables:****Table S1: Chemicals and reagents used for cell treatments**

| <b>Reagent / Chemical</b>                            | <b>Manufacturer</b> | <b>Product number</b> |
|------------------------------------------------------|---------------------|-----------------------|
| Bayer-18                                             | Synkinase           | SYN-1130              |
| Doxycycline (Dox)                                    | Sigma               | D9891                 |
| Epidermal Growth Factor (EGF)                        | Sigma               | E9644                 |
| Interferon $\alpha$ (IFN $\alpha$ )                  | Immunotools         | 11343504              |
| Interferon $\gamma$ (IFN $\gamma$ )                  | Immunotools         | 11343534              |
| Interleukin-11 (IL11)                                | Peprtech            | 200-11                |
| Interleukin-17A (IL17A)                              | Peprtech            | 200-17                |
| lestaurtinib                                         | Tinib Tools         | L100                  |
| MG132                                                | Sigma               | C2211                 |
| Oncostatin M (OSM)                                   | Immunotools         | 11344223              |
| panJAK Inhibitor I (panJAK-Inh I)                    | Calbiochem          | 420099                |
| Interleukin-6 (IL6; human)                           | Peprtech            | 200-06                |
| Interleukin-6 (IL6; mouse)                           | Peprtech            | 216-16                |
| Smoothened agonist (SAG)                             | Axxora              | BV-1939               |
| STATTIC                                              | Sigma               | S7947                 |
| Transforming growth factor $\beta$ 3 (TGF $\beta$ 3) | Peprtech            | 100-36E               |
| Tumor necrosis factor $\alpha$ (TNF $\alpha$ )       | Immunotools         | 11343013              |

**Table S2: Primer sequences used for qPCR and ChIP-qPCR analysis**

| <b>Human Gene</b> | <b>Forward primer (5'-3')</b>   | <b>Reverse primer (5'-3')</b>   | <b>Application</b> |
|-------------------|---------------------------------|---------------------------------|--------------------|
| RPLP0             | (Eberl et al, 2012)             |                                 | qPCR               |
| EDN2              | CCACTTGGACATCATCTG<br>GGTGAACA  | TGGAAATGTCCCTCAG<br>CCTTTGGAG   | qPCR               |
| IL6R              | CCCCACTCCTGGAATC<br>ATCTTTC     | ACTCGCCTTGCCCGAA<br>CTCCTC      | qPCR               |
| JAK2              | TGGAGATGTGCCGGTATG<br>ACCCTCT   | TACGCCGACCAGCACT<br>GTAGCACAC   | qPCR               |
| NRP1              | TCAGGGAAACACCAACC<br>CCACAGA    | CACCATACCCAACATT<br>CCAGAGCAAGG | qPCR               |
| PTCH              | (Eberl et al, 2012)             |                                 | qPCR               |
| PLAT              | GGAAATCCATGCCCGATT<br>CAGAAGA   | CTCGCTGCAACTTTTG<br>ACAGGCACT   | qPCR               |
| STAT3             | AGGCGTCACTTTCCTTG<br>GGTGGAG    | TCCTGGCTCTCTGGCC<br>GACAATACT   | qPCR               |
| EDN2              | GGGAGGGGAAAGCAGGG<br>ATGAAC     | TCAGCCAGGGCAGGA<br>ACAGAGG      | ChIP-qPCR          |
| NRP1              | CCCTGATTTCCACACCCC<br>TCCCTA    | CCGAGATTTGGTGCCC<br>GTTCC       | ChIP-qPCR          |
| PLAT              | TGGGGAAAACGGGAACA<br>ATAGTCTGG  | TGCATCCTTGGCTCTG<br>GGAAACA     | ChIP-qPCR          |
| PTCH              | (Winklmayr et al, 2010)         |                                 | ChIP-qPCR          |
| <b>Mouse Gene</b> | <b>Forward primer (5'-3')</b>   | <b>Reverse primer (5'-3')</b>   | <b>Application</b> |
| Rplp0             | (Eberl et al, 2012)             |                                 | qPCR               |
| Stat3             | TGTAGAGCCATACACCAA<br>GCAGCAGC  | GGTCTTCAGGTACGGG<br>GCAGCAC     | qPCR               |
| Edn2              | TCTGCCTGTGCTACCTTCT<br>GCCATC   | CAGGGATGGCCTTTCT<br>TGTCACCTC   | qPCR               |
| Nrp1              | TGATGAAACAGGGAGCA<br>CTCCAGGATA | ACAACCTCCACAGACTG<br>CACCCAGGA  | qPCR               |
| Plat              | CAGTCCAAGCAATGTGCC<br>CAAGAGA   | TCAGCCGGTCAGAGA<br>AGAATGGAGA   | qPCR               |

**Table S3: Antibodies used for Western blot, IHC and ChIP analysis**

| <b>Antigen, antibody</b> | <b>Cat.No.</b> | <b>Manufacturer</b>       | <b>Dilution</b>                                     | <b>Application</b> |
|--------------------------|----------------|---------------------------|-----------------------------------------------------|--------------------|
| GLI1, V812               | 2534           | Cell Signaling Technology | 1:1000                                              | Western blot       |
| GLI1, C-18               | sc-6152        | Santa Cruz Biotechnology  | 1:1000                                              | Western blot       |
| STAT3                    | 610189         | BD Biosciences            | 1:5000                                              | Western blot       |
| Phospho-STAT3, Tyr705    | 9131           | Cell Signaling Technology | 1:1000                                              | Western blot       |
| JAK2, D2E12              | 3230           | Cell Signaling Technology | 1:1000                                              | Western blot       |
| Phospho-JAK2, C80C3      | 3776           | Cell Signaling Technology | 1:1000                                              | Western blot       |
| SUFU, C-15               | sc-10933       | Santa Cruz Biotechnology  | 1:1000                                              | Western blot       |
| $\beta$ -Tubulin, 9F3    | 2128           | Cell Signaling Technology | 1:1000                                              | Western blot       |
| $\beta$ -Actin, C4       | sc-47778       | Santa Cruz Biotechnology  | 1:3000                                              | Western blot       |
| PARP                     | 9542           | Cell Signaling Technology | 1:1000                                              | Western blot       |
| ERK1/2                   | 9102           | Cell Signaling Technology | 1:1000                                              | Western blot       |
| IL6R, C-20               | sc-661         | Santa Cruz                | 1:200                                               | IHC                |
| Total-STAT3, H-190       | sc-7179        | Santa Cruz                | 1:200                                               | IHC                |
| Ki67                     | NCL-ki67p      | Novocastra                | 1:100                                               | IHC                |
| MYC-Tag, 9B11            | 2276           | Cell Signaling Technology | 1:100                                               | ChIP               |
| H3K27ac, D5E4            | 8173           | Cell Signaling Technology | 1:100                                               | ChIP               |
| STAT3, C-20              | sc-482X        | Santa Cruz Biotechnology  | 5 $\mu$ g/10 $\mu$ g chromatin                      | ChIP               |
| normal mouse IgG         | 5415           | Cell Signaling Technology | used at the same concentration as the test antibody | ChIP               |
| normal rabbit IgG        | 2729           | Cell Signaling Technology |                                                     | ChIP               |
| normal rabbit IgG        | sc-2027X       | Santa Cruz Biotechnology  |                                                     | ChIP               |
| Phospho-ERK1/2, E10      | 9106           | Cell Signaling Technology | 1:1000                                              | Western blot       |
| Phospho-AKT, D9E         | 4060           | Cell Signaling Technology | 1:1000                                              | Western blot       |
| AKT                      | 9272           | Cell Signaling Technology | 1:1000                                              | Western blot       |
| Phospho-c-JUN, D47G9     | 3270           | Cell Signaling Technology | 1:1000                                              | Western blot       |
| JUN                      | 610327         | BD Biosciences            | 1:5000                                              | Western blot       |

**Table S4: Primer sequences for bisulfite pyrosequencing**

| <b>Target region in EDN2 relative to TSS</b> | <b>Forward primer (5'-3')</b>                               | <b>Reverse primer (5'-3')</b>                           | <b>Sequencing primer (5'-3')</b> | <b>Annealing temp.</b> |
|----------------------------------------------|-------------------------------------------------------------|---------------------------------------------------------|----------------------------------|------------------------|
| STAT3 binding region (-8720)                 | [Btn]GGTTTGAGT<br>TTAGGGGTAGTA<br>GGAGAA                    | TTACTCACCTCAC<br>CACCCAACACA                            | CACCACCCAACA<br>CAC              | 69.4°C                 |
| GLI1 binding site (-8543)                    | AGGGGTAGTAGG<br>AGAAGTTT                                    | GACGGGACACCG<br>CTGATCGTTTAA<br>CACCTCACCACC<br>CAACACA | AGTTTGGTTTTAG<br>TTTTTAGG        | 61.0°C                 |
| GLI1 binding site (-8514)                    | GACGGGACACCG<br>CTGATCGTTTAA<br>GTTTGAGTTTAG<br>GGGTAGTAGGA | CTCCCACCCTAA<br>ATCATTACT                               | CTCACCACCCAA<br>CAC              | 63.4°C                 |

TSS, transcription start site; Btn, Biotin tag;

**Table S5: Screen of activation of established downstream effectors by secreted factors in HaCaT cells**

| Secreted factors              | Downstream effectors |        |        |      |       |         |       |      |
|-------------------------------|----------------------|--------|--------|------|-------|---------|-------|------|
|                               | pSTAT1               | pSTAT3 | pSTAT4 | pJUN | pNFkB | pERK1/2 | pJAK2 | pAKT |
| <b>CCL5</b>                   | n.d.                 | -      | -      | -    | -     | -       | -     | n.d. |
| <b>GM-CSF</b>                 | n.d.                 | -      | n.d.   | n.d. | n.d.  | n.d.    | -     | n.d. |
| <b>IFN<math>\alpha</math></b> | +                    | ++     | n.d.   | n.d. | n.d.  | n.d.    | n.d.  | n.d. |
| <b>IFN<math>\gamma</math></b> | ++                   | +      | n.d.   | n.d. | n.d.  | +       | n.d.  | +    |
| <b>IL6</b>                    | -                    | +++    | n.d.   | n.d. | n.d.  | -       | n.d.  | n.d. |
| <b>IL8</b>                    | n.d.                 | -      | n.d.   | n.d. | n.d.  | -       | n.d.  | -    |
| <b>IL11</b>                   | n.d.                 | -      | n.d.   | n.d. | n.d.  | -       | n.d.  | n.d. |
| <b>IL12</b>                   | n.d.                 | -      | -      | -    | -     | -       | -     | n.d. |
| <b>IL13</b>                   | n.d.                 | -      | n.d.   | n.d. | n.d.  | -       | n.d.  | n.d. |
| <b>IL17</b>                   | n.d.                 | -      | -      | -    | +     | -       | -     | +    |
| <b>OSM</b>                    | n.d.                 | +++    | n.d.   | n.d. | n.d.  | n.d.    | +     | n.d. |
| <b>TGF<math>\beta</math></b>  | n.d.                 | n.d.   | n.d.   | n.d. | n.d.  | +       | n.d.  | n.d. |
| <b>TNF<math>\alpha</math></b> | n.d.                 | -      | -      | ++   | ++    | ++      | -     | +++  |

- not detected, + weak phosphorylation, ++ medium phosphorylation, +++ strong phosphorylation, n.d. not determined; cytokines and growth factors highlighted in light blue selected for oncogenic transformation assays;
